# Supplementary material for: Solvothermal synthesis of two new coordination polymers: in situ heterocycle conversion and N-alkylation, network topologies and luminescence properties
Source: Royal Society of Chemistry journal article supplement (doi:10.1039/c2ce06747a), 2012-01-01
Supplement: c2ce06747a.pdf [file c2ce06747a.pdf]

## Support Information

Zhenlan Fang,<sup>a,b</sup> Wenbin Yang,<sup>a,b</sup> Jiangang He,<sup>a</sup> Kaining Ding,<sup>c</sup> Xiaoyuan Wu,<sup>a,b</sup> Qisheng Zhang,<sup>a</sup>  
Rongmin Yu,<sup>a,b</sup> and Canzhong Lu<sup>\*a,b</sup>

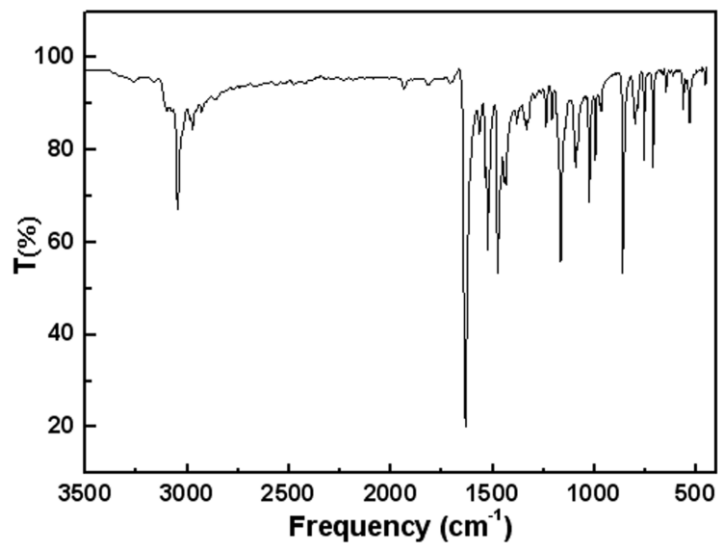

Figure S1. FT-IR spectroscopic characterization for complex 1.

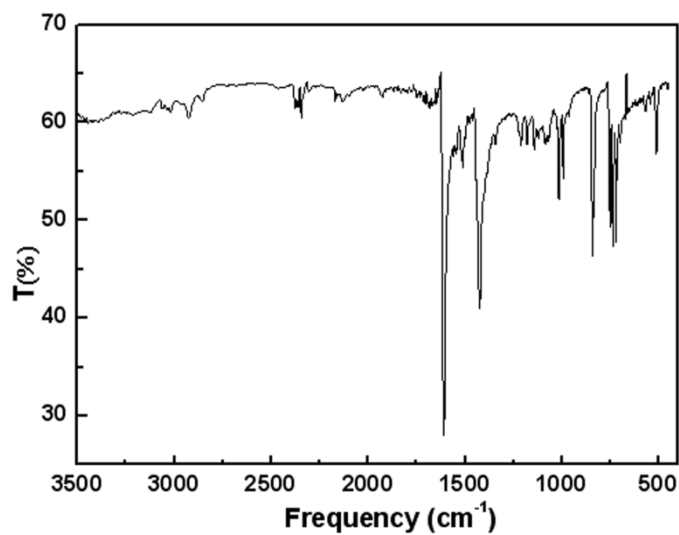

Figure S2. FT-IR spectroscopic characterization for complex 2.

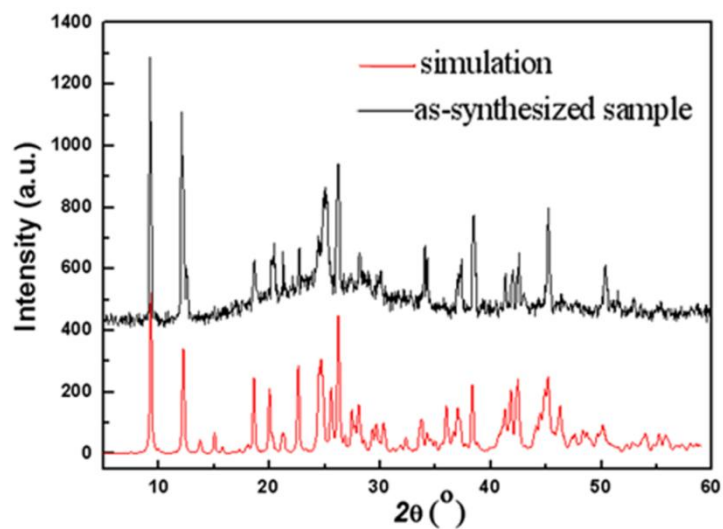

**Figure S3.** XRPD patterns of simulated from a single crystal of complex **1** (red), and as-synthesized sample of complex **1** (dark).

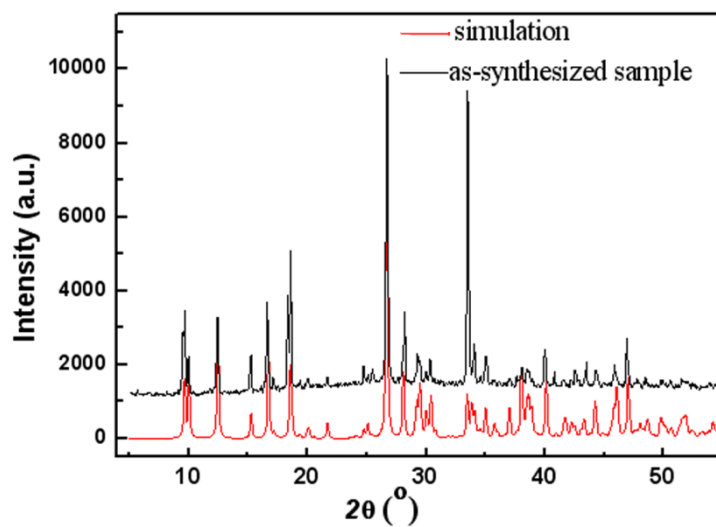

**Figure S4.** XRPD patterns of simulated from a single crystal of complex **2** (red), and as-synthesized sample of complex **2** (dark).

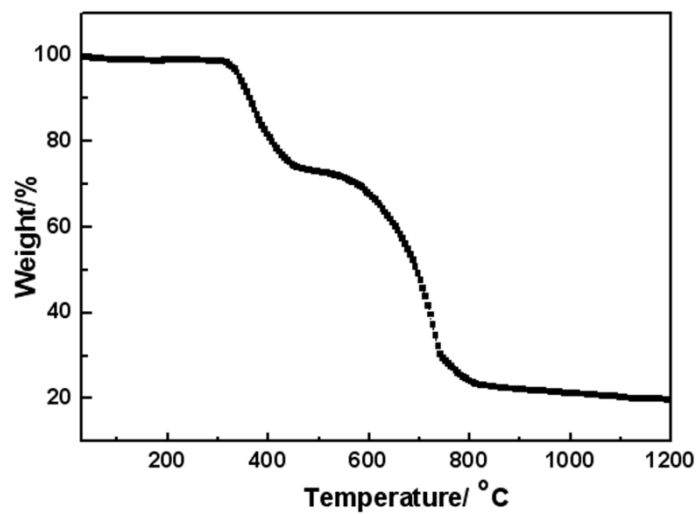

**Figure S5.** TGA profile for complex 1.

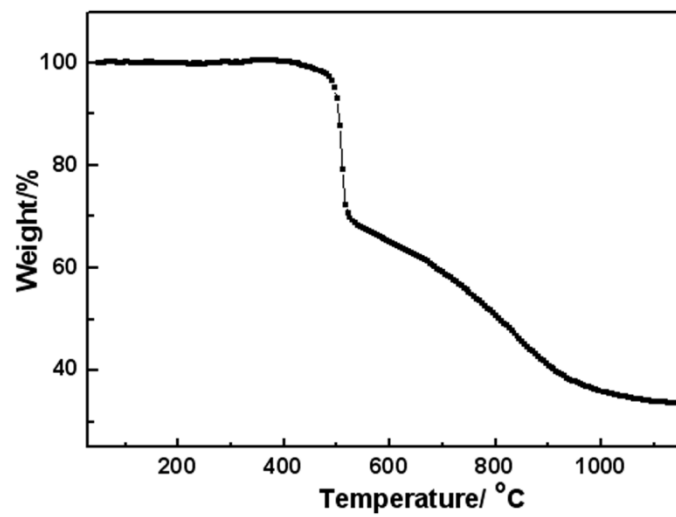

**Figure S6.** TGA profile for complex 2.
